# Supplementary material for: A novel approach for spectrophotometric determination of succinylcholine in pharmaceutical formulation via host–guest complexation with water-soluble p-sulfonatocalixarene
Source: Royal Society of Chemistry journal article supplement (doi:10.1039/c5ra10166b), 2015-01-01
Supplement: c5ra10166b1.pdf [file c5ra10166b1.pdf]

## **Supplementary Information for**

### **“Novel Approach for Spectrophotometric Determination of Succinylcholine in Pharmaceutical Formulation via Host-Guest Complexation with Water-Soluble *p*-Sulfonatocalixarene”**

Mohamed K. Abd El-Rahman<sup>a</sup> and Amr M. Mahmoud<sup>a</sup>

<sup>a</sup> Analytical Chemistry Department, Faculty of Pharmacy, Cairo University, Kasr-El Aini Street, Cairo, Egypt 11562.

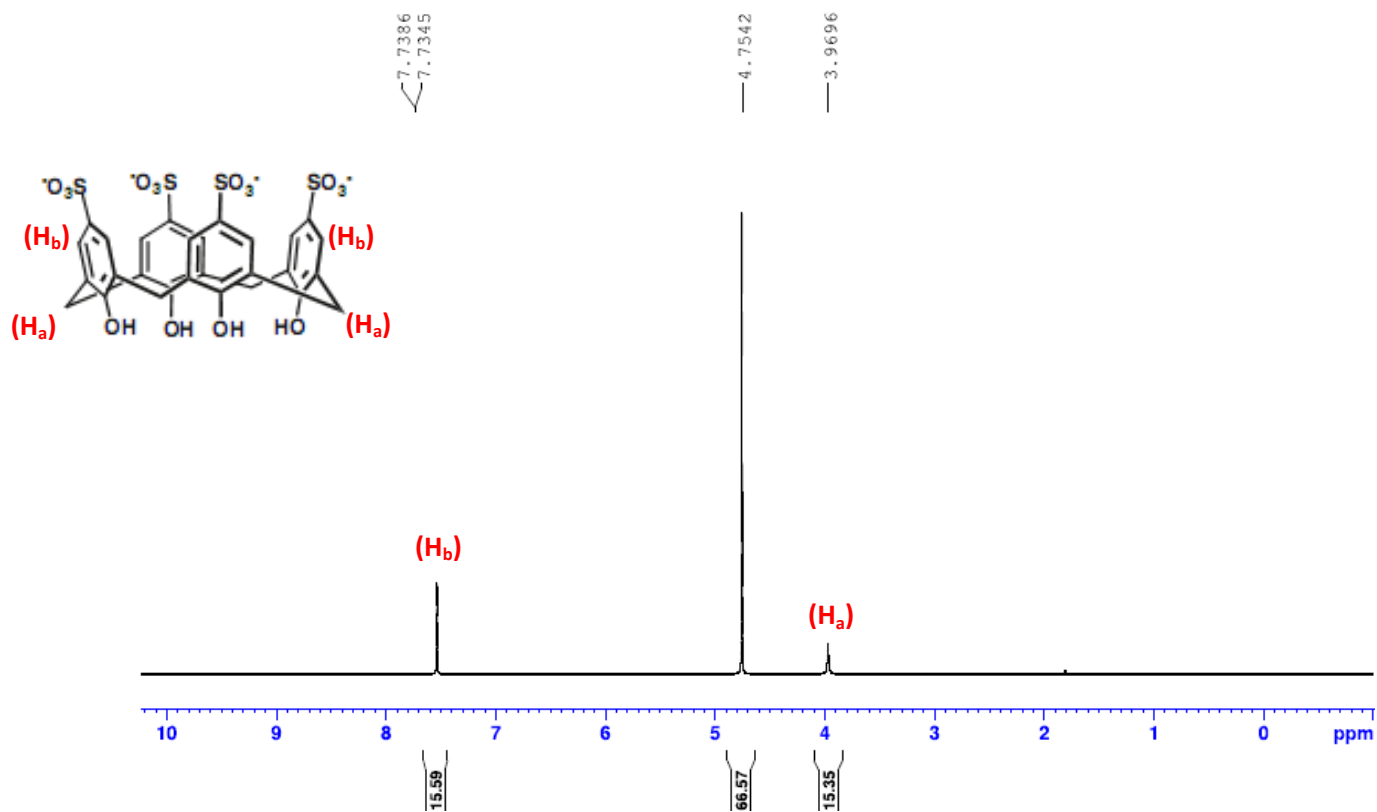

**Figure S-1.**  $^1\text{H}$  NMR spectra of SCX 4 with appropriate protons labeled letters.

## Section.1. Job's Plot by UV-spectroscopy

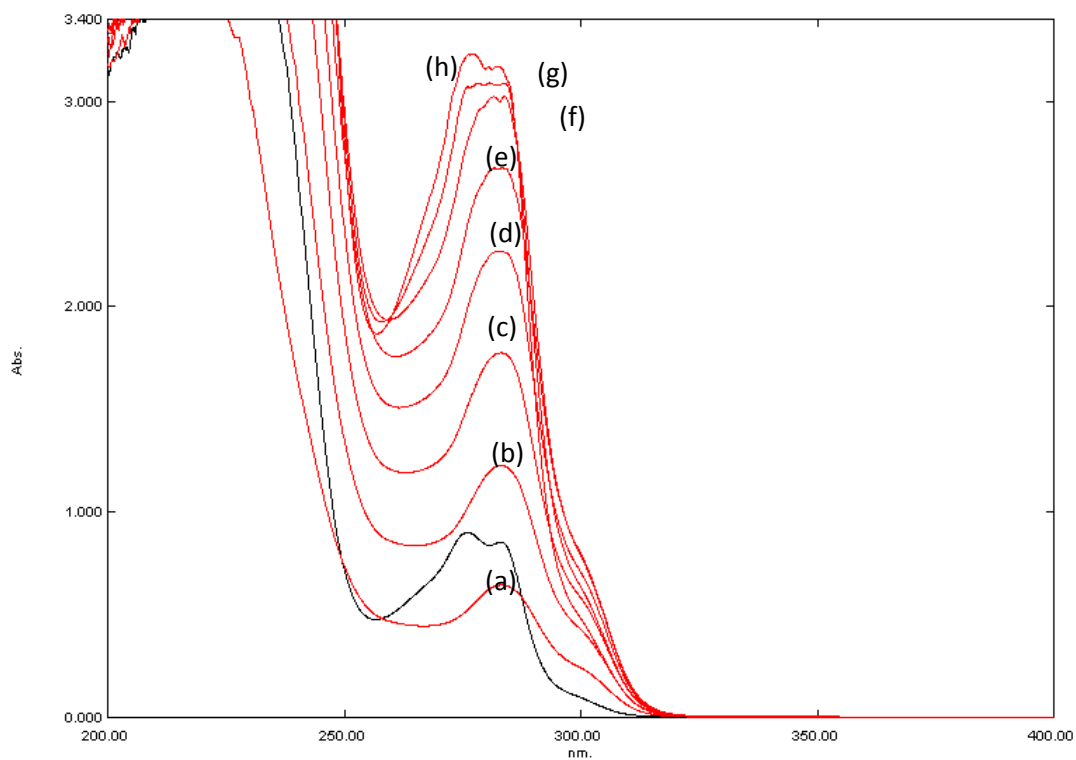

**Figure S-2.** UV spectra in deionized water of a series of solutions of different molar ratio of SCX4 and SUC between 0 and 1,  $[SUC] + [SCX4] = 1.0 \times 10^{-3} M$ . The black curve is the UV-spectrum of the divisor  $2 \times 10^{-4} M$  SCX4.

(a). (0.1 mM SCX4: 0.9 mM SUC), (b). (0.2 mM SCX4: 0.8 mM SUC), (c). (0.3 mM SCX4: 0.7 mM SUC), (d). (0.4 mM SCX4: 0.6 mM SUC), (e). (0.5 mM SCX4: 0.5 mM SUC), (f). (0.6 mM SCX4: 0.4 mM SUC), (g). (0.7 mM SCX4: 0.3 mM SUC), (h). (0.8 mM SCX4: 0.2 mM SUC).

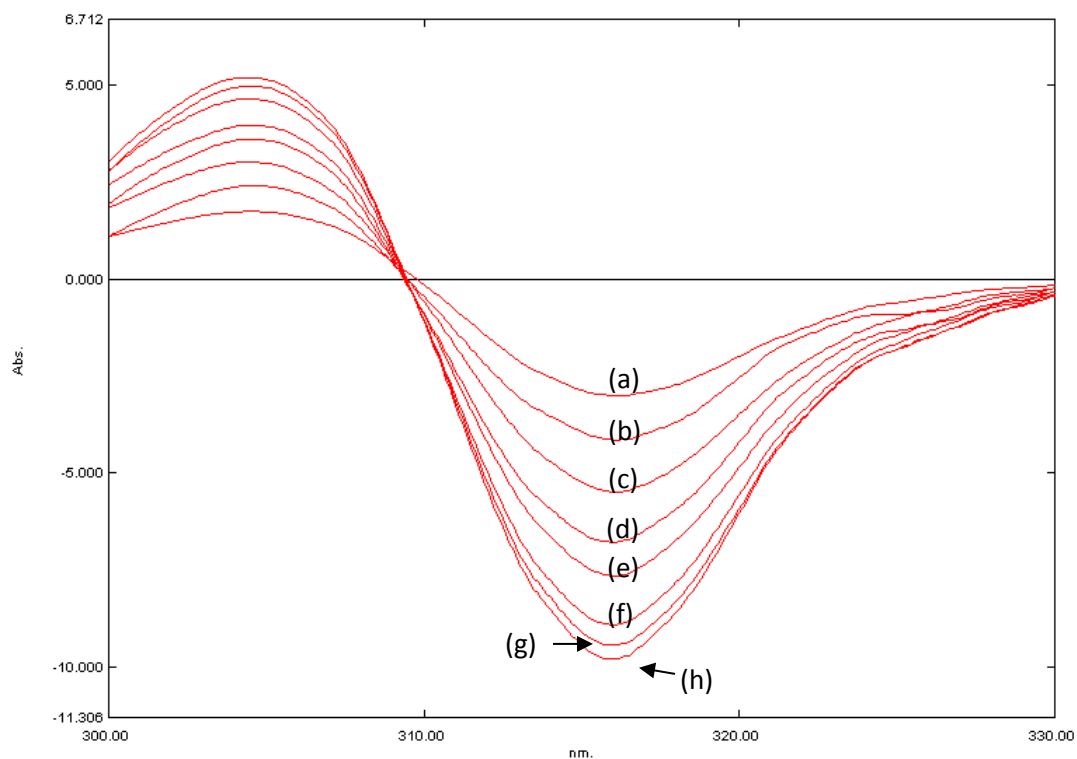

**Figure S-3.** First derivative of ratio spectra of the complex using  $2 \times 10^{-4}$  M SCX4 as a divisor, (a).(0.1 mM SCX4: 0.9 mM SUC), (b).(0.8mM SCX4: 0.2mM SUC), (c).(0.2mM SCX4: 0.8mM SUC), (d). (0.7mM SCX4: 0.3mM SUC), (e). (0.3mM SCX4: 0.7mM SUC), (f). (0.4mM SCX4: 0.6mM SUC), (g). (0.6mM SCX4: 0.4mM SUC), (h). (0.5mM SCX4: 0.5mM SUC).

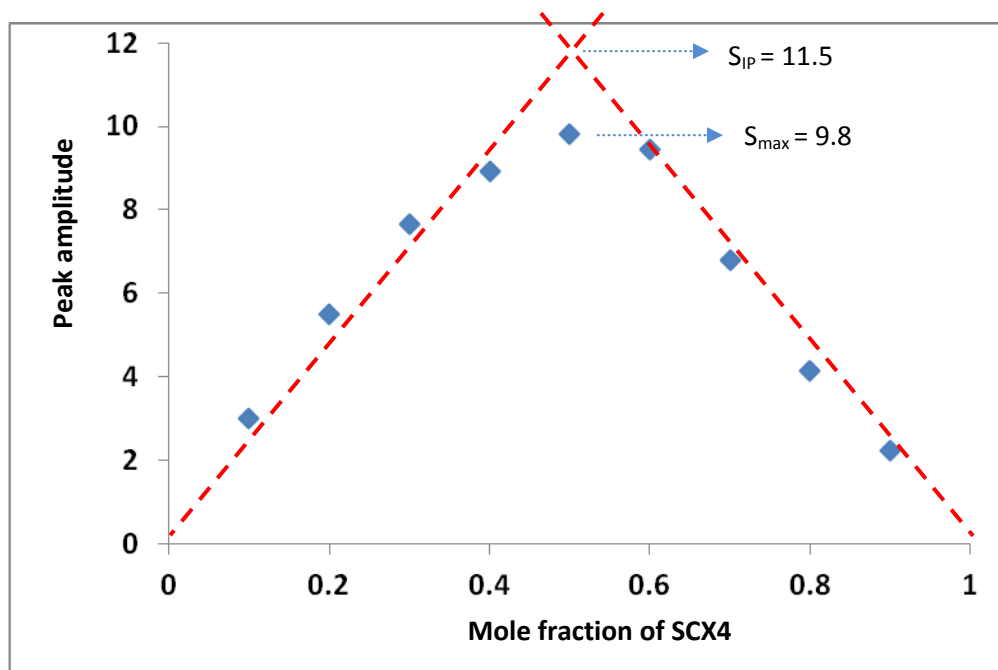

**Figure S-4.** Job's plot for the determination of the stoichiometry of SCX4 and SUC in the complex,  $[SUC] + [SCX4] = 1.0 \times 10^{-3} M$ .

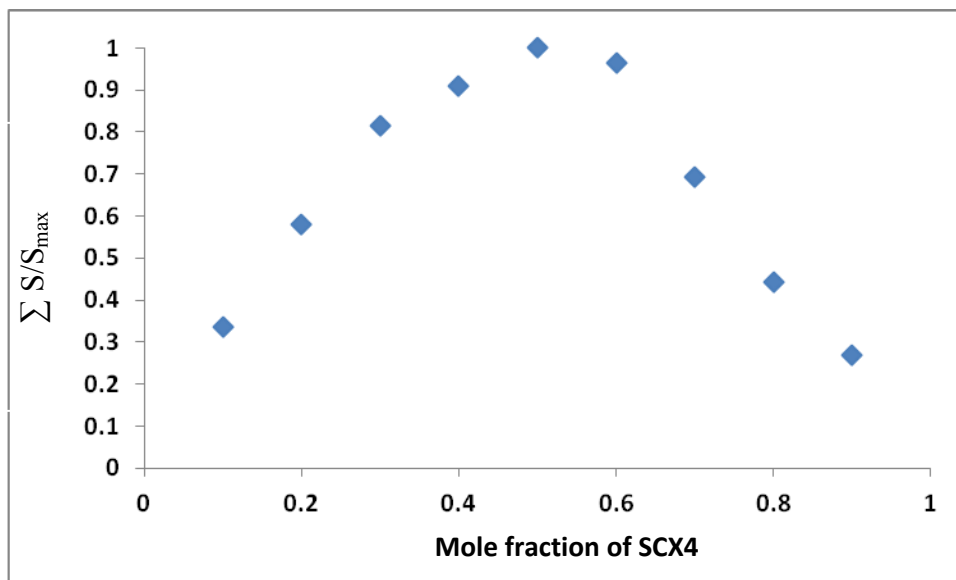

**Figure S-5.** Normalized Job's plot for the determination of the stoichiometry of SCX4 and SUC in the complex,  $[SUC]+[SCX4]=1.0 \times 10^{-3} M$ .

**Table S-1.** The experimentally determined values of  $S/S_{\max}$  and the value of  $\Sigma S/S_{\max}$  [1].

| Mole fraction of host (SCX4) | Peak amplitude (S) | $S/S_{\max}$ |
|------------------------------|--------------------|--------------|
| 0.1                          | 3.30               | 0.34         |
| 0.2                          | 5.69               | 0.58         |
| 0.3                          | 7.99               | 0.81         |
| 0.4                          | 8.92               | 0.91         |
| 0.5                          | 9.80*              | 1            |
| 0.6                          | 9.44               | 0.963        |
| 0.7                          | 6.79               | 0.69         |
| 0.8                          | 4.35               | 0.44         |
| 0.9                          | 2.63               | 0.27         |
| $\Sigma S/S_{\max}$          |                    | <b>6.01</b>  |

\*  $S_{\max}$

## Section 2. Theoretical relation between the concentrations of SUC and the inclusion complex formed

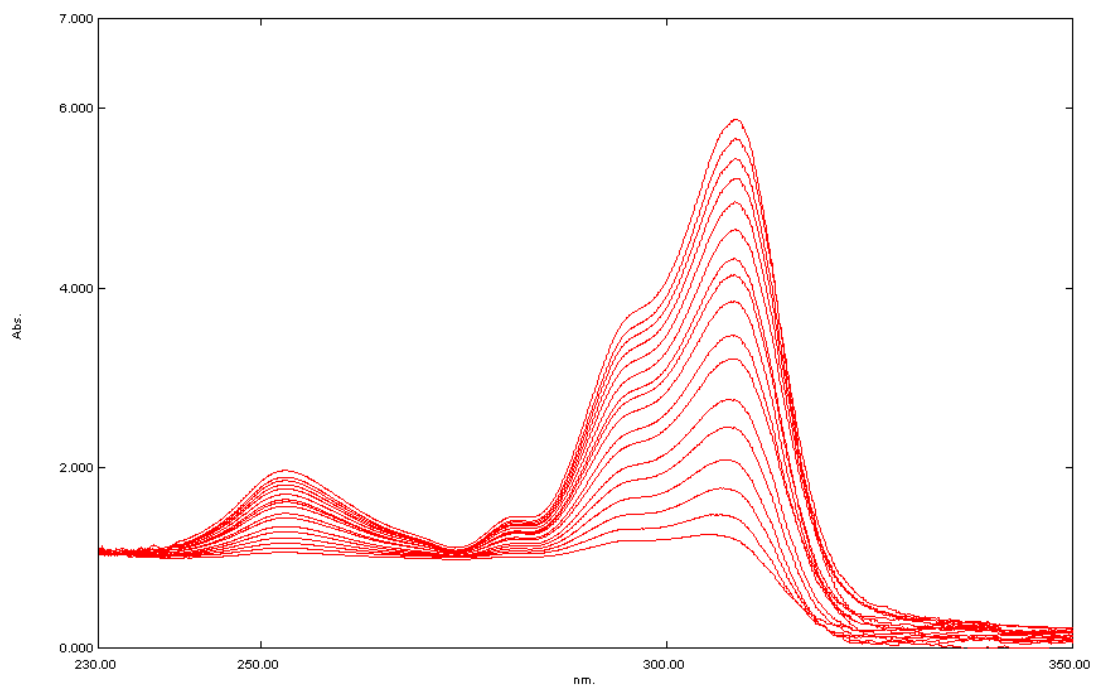

**Figure S-6.** Ratio spectra of SUC ( $1 \times 10^{-5}$ – $18 \times 10^{-5}$  M) using the spectrum of  $2 \times 10^{-4}$  M of SCX4 as a divisor

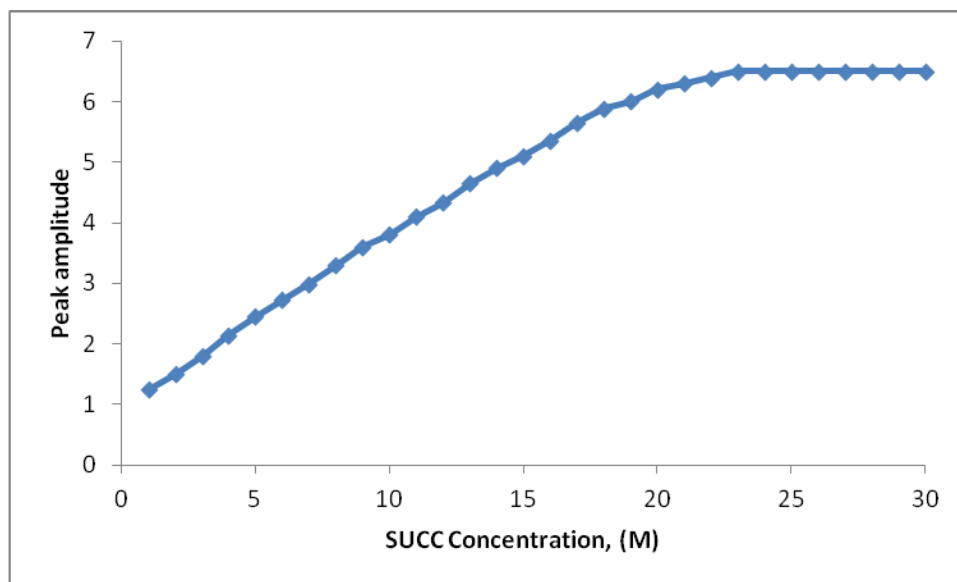

**Figure S-7.** Plot of peak amplitude of (SCX4-SUC) host-guest complex at 315 nm vs. the concentration of SUC in ranges lower and higher than the host.

## References:

- [1] E.J. Olson, P. Buhlmann, *J Org Chem*, 76 (2011) 8406.
